# Supplementary material for: HopA1 Effector from Pseudomonas syringae pv syringae Strain 61 Affects NMD Processes and Elicits Effector-Triggered Immunity
Source: MDPI journal article supplement (doi:10.3390/ijms22147440), 2021-07-12
Supplement: s1 [file s1]

## Supplementary Information:

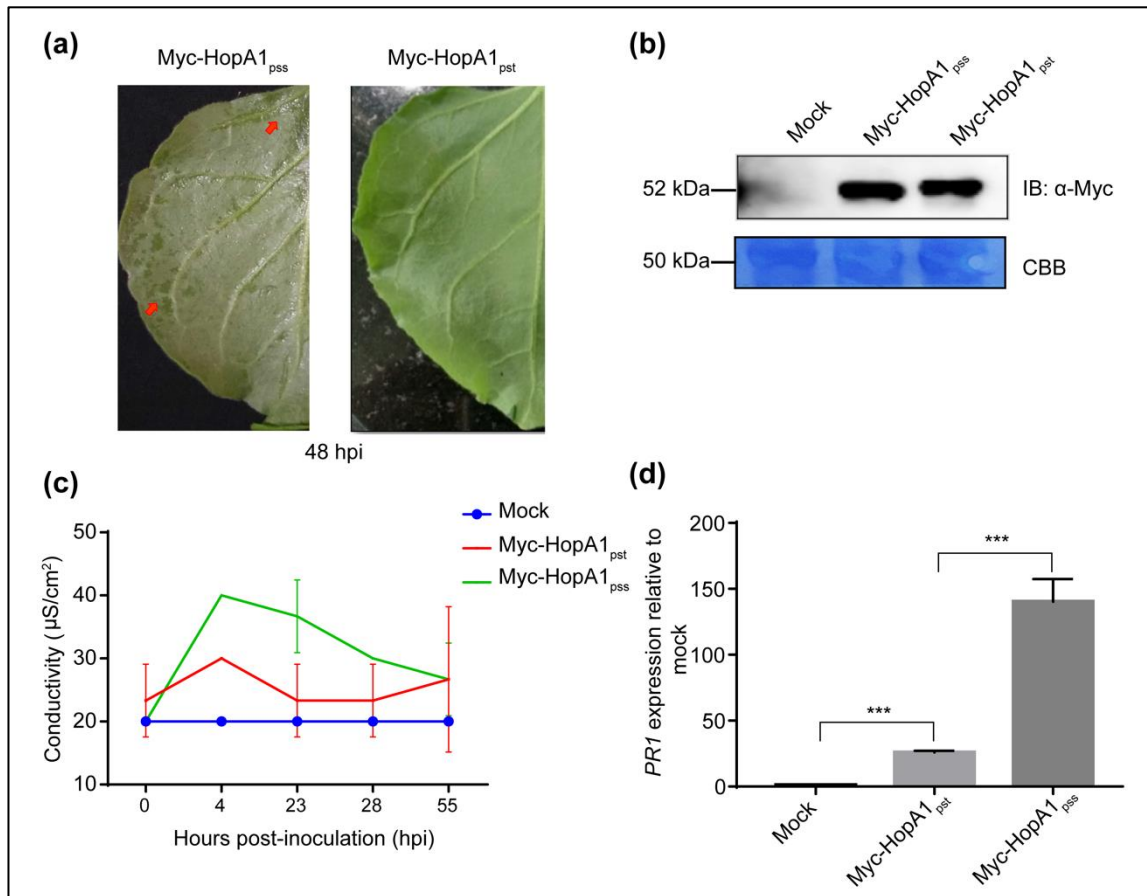

**Supplementary Figure S1: In *N. benthamiana*, transient expression of HopA1<sub>pss</sub> elicits stronger defenses than HopA1<sub>pst</sub>.** Buffer alone (mock) or agrobacterium strains expressing Myc-HopA1<sub>pss</sub> or Myc-HopA1<sub>pst</sub> were infiltrated into fully expanded leaves. **(a)** Infiltrated leaf imaged at 48-hours post-infiltration (hpi). **(b)** Expression levels of Myc-HopA1<sub>pss</sub> or Myc-HopA1<sub>pst</sub> proteins determined at 48hpi via immunoblotting with anti-Myc antibodies. **(c)** conductance assay on infiltrated leaf discs at indicated time points (hpi). **(d)** Expression levels of *PR1* transcripts at 48hpi. Ponceau S stained membrane shows comparable protein loading between samples. Values are mean  $\pm$  SD (n=10 for conductance assays, n=3 for qRT-PCRs). Statistical analysis shown is according to Student's *t*-test ( $p^{**}<0.01$ ).

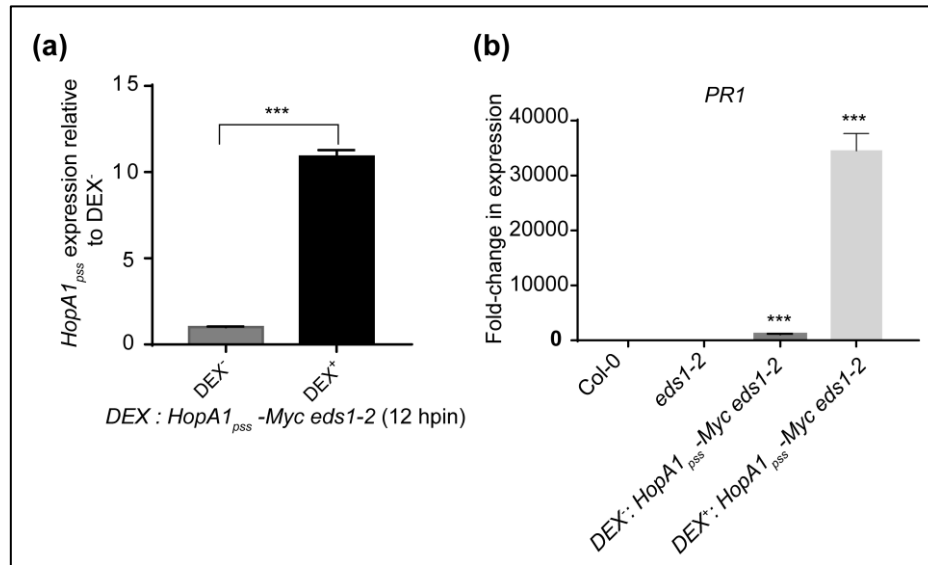

**Supplementary Figure S2: HopA1<sub>pss</sub> over-expression elicits *EDS1*-independent *PR1* upregulation.** *Dex:HopA1<sub>pss</sub>-Myc eds1-2* transgenic plants without (Dex<sup>-</sup>) and with (Dex<sup>+</sup>) dexamethasone (Dex)-treatment at 24-hours post-induction (hpin). **(a)** *HopA1<sub>pss</sub>*, and **(b)** *PR1* transcript levels at 12- or 24-hpin. Data is representative of mean  $\pm$  SD (n=3). Pairwise Student's *t*-test was used to determine statistical significance ( $p^{***}<0.001$ ).

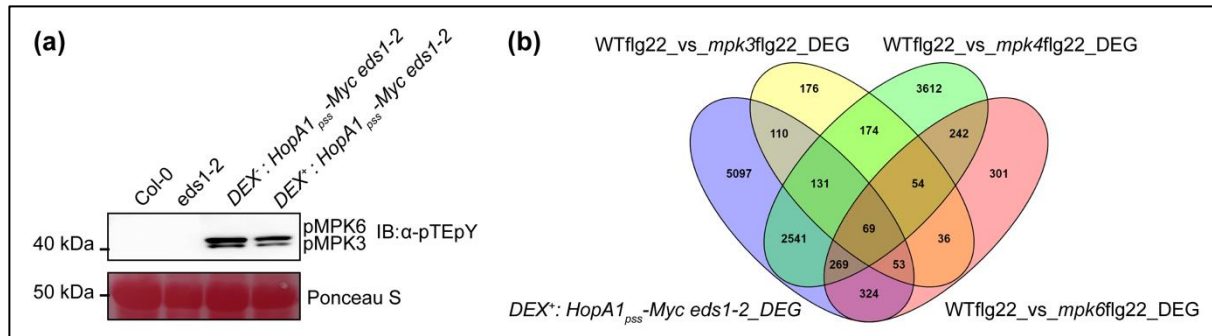

**Supplementary Figure S3: MPK3/6 phosphorylations are enhanced by HopA1<sub>pss</sub> expression *in planta*.** (a) Immunoblot of total protein extracts from Col-0, *eds1-2*, Dex<sup>-</sup> and Dex<sup>+</sup> HopA1<sub>pss</sub>-expressing transgenic plants at 12hpin with anti-active MAPK pTEpY polyclonal antibodies. Positions of phosphorylated MPK3 and MPK6 are indicated. Ponceau S stained membrane represents comparable protein loading across samples. (b) Venn diagram of DEG overlaps of Dex<sup>+</sup> HopA1<sub>pss</sub> plants with similar datasets from flg22-elicited *mpk3*, *mpk4*, or *mpk6* mutants versus flg22-WT (from Bazin *et al.*, 2020).

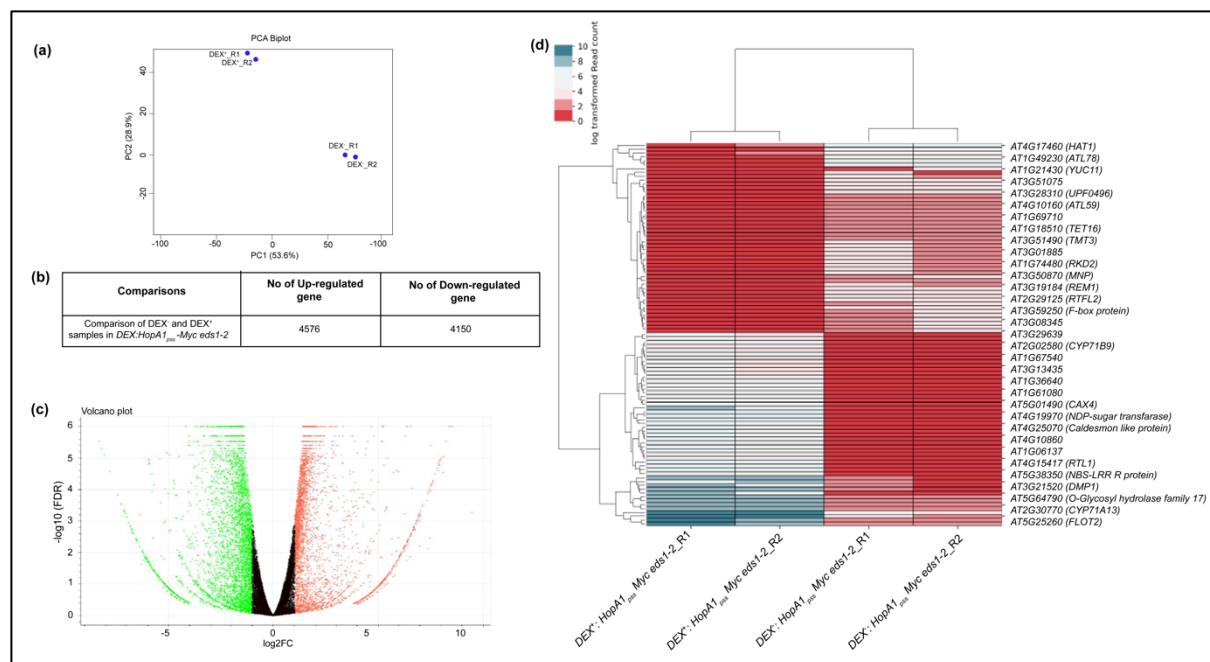

**Supplementary Figure S4: Differentially expressed genes (DEGs) in ETI<sup>HopA1<sup>pss</sup></sup>-like responses.** (a) Scatter plot of Principal Components (PCs) of the data from all samples. Each point represents an RNAseq sample. Samples with similar gene expressions are closer in the two-dimensional space. Replicate 1 and 2 (Dex<sup>+</sup>\_R1 and \_R2) of Dex-treatment or untreated (Dex<sup>-</sup>\_R1 and \_R2) are marked. (b) Number of DEGs in the RNAseq data. (c) Volcano plot of DEGs. (d) Heatmaps of top 50 upregulated and top 10 downregulated candidate genes in replicate samples processed for RNAseq.

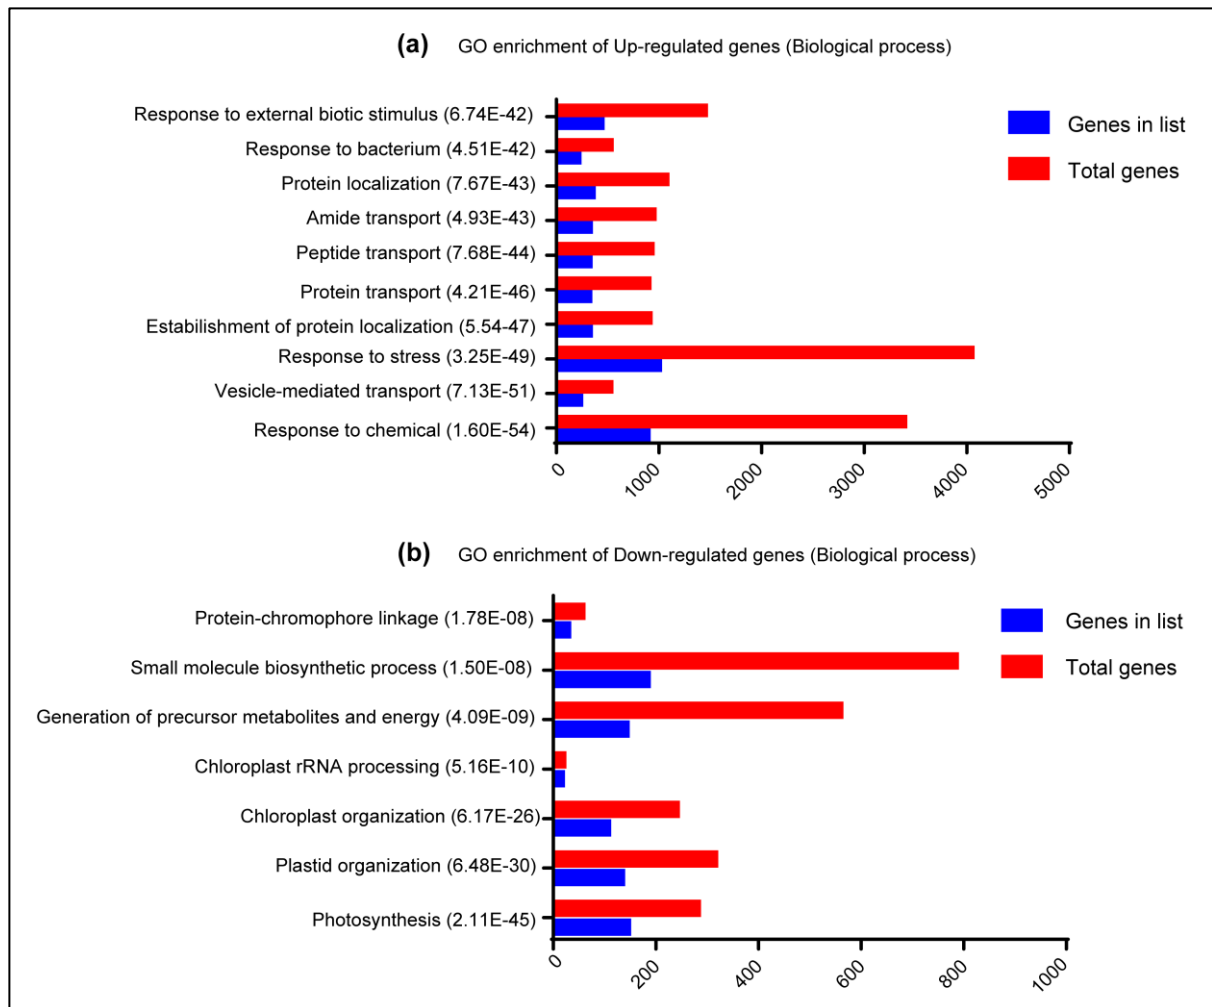

**Supplementary Figure S5: GO enrichment categorizations of DEGs in Dex<sup>+</sup> HopA1<sub>pss</sub>-expressing transgenic plants in terms of biological processes. (a) Upregulated, and (b) downregulated DEGs.**

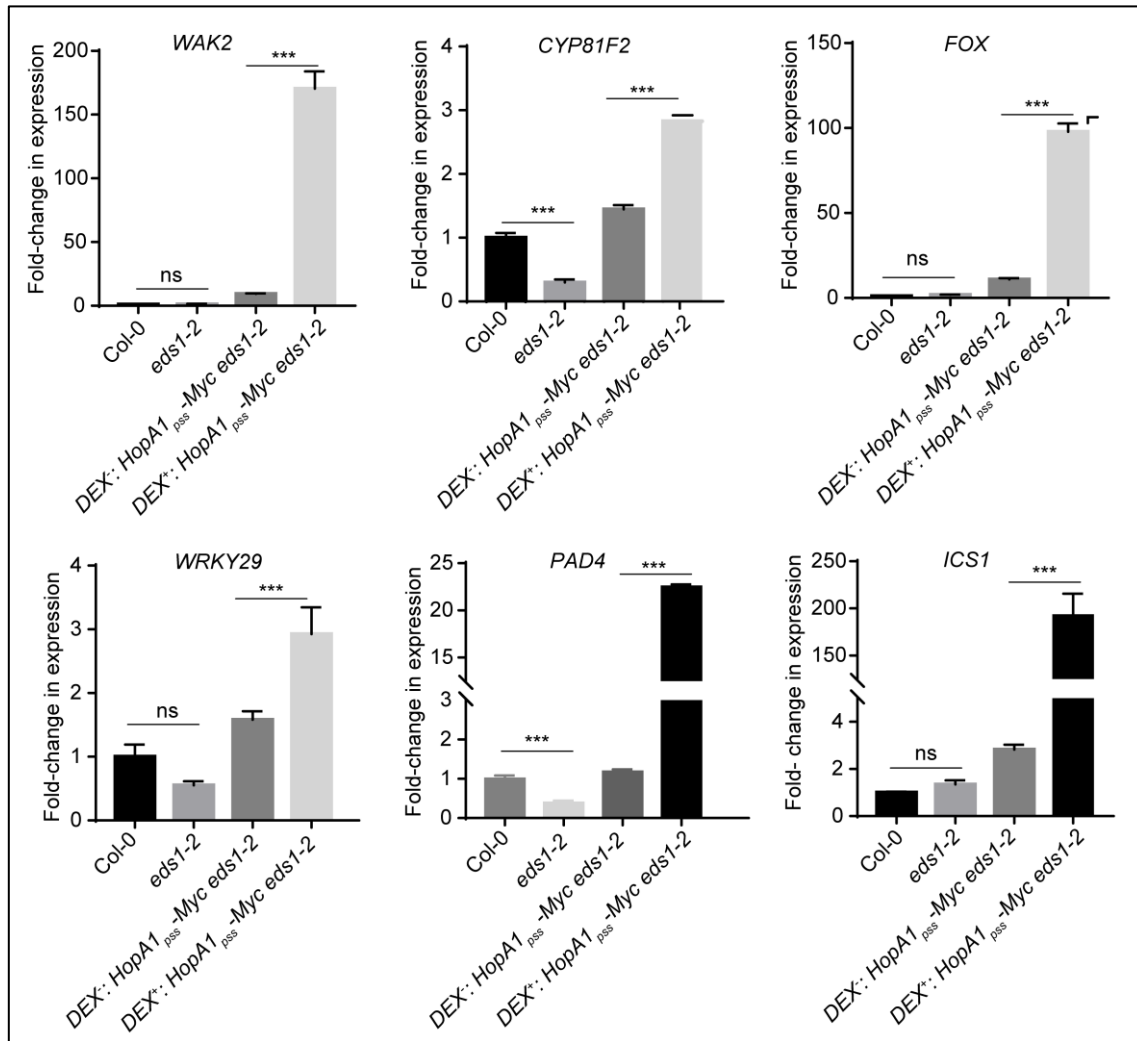

**Supplementary Figure S6: ETI<sup>HopA1<sub>pss</sub></sup>-like elicitation upregulates expression of PTI and other defense-associated transcripts.** Expression levels of *WAK2*, *CYP81F2*, *FOX*, *WRKY29*, *PAD4* and *ICS1* in HopA1<sub>pss</sub>-expressing transgenic at 12hpin or uninduced control, Col-0 and *eds1-2* plants. Data is mean  $\pm$  SD (n=3) and represented as fold-change relative to Col-0. Statistical significance is with Student's *t*-test and show pairwise comparisons to Col-0 levels ( $p^{***}<0.001$ ).

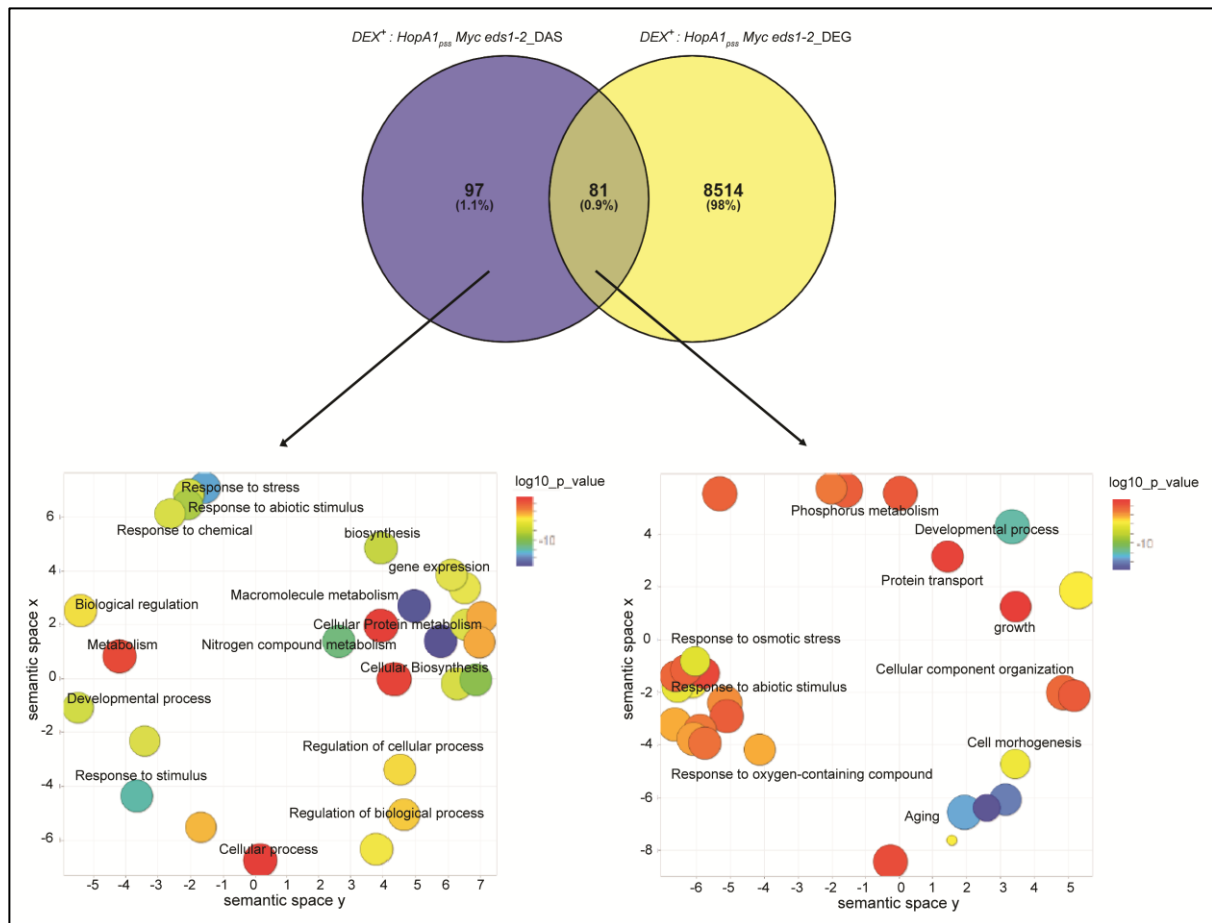

**Supplementary Figure S7: REVIGO plots of biological process GO enrichment clusters present in DEGs and DAS of Dex<sup>+</sup> HopA1<sub>pss</sub>-expressing transgenic plants. Labeling is shown only for highest significant categorizations.**

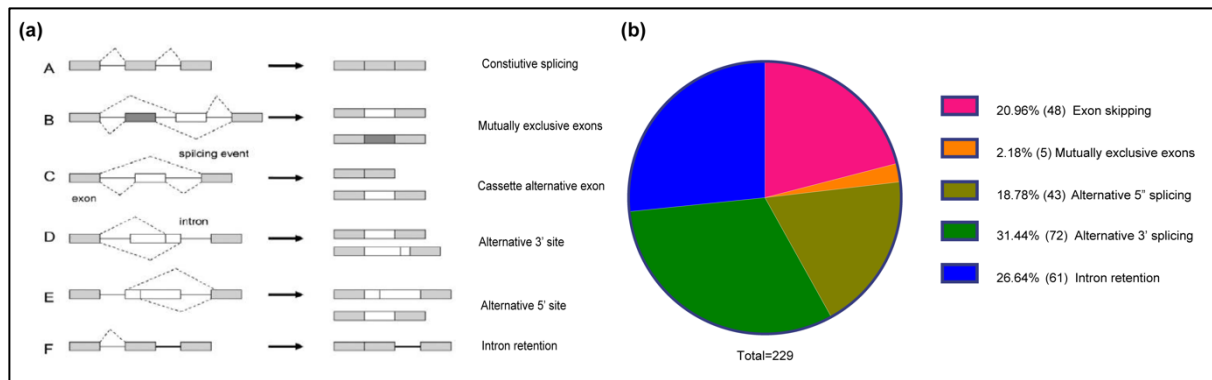

**Supplementary Figure S8: Classification of DAS events in ETI<sup>HopA1<sup>pss</sup></sup>-like responses. (a)** Schematic representation of AS events. **(b)** Pie chart showing enrichment of DAS according to AS event categorizations.



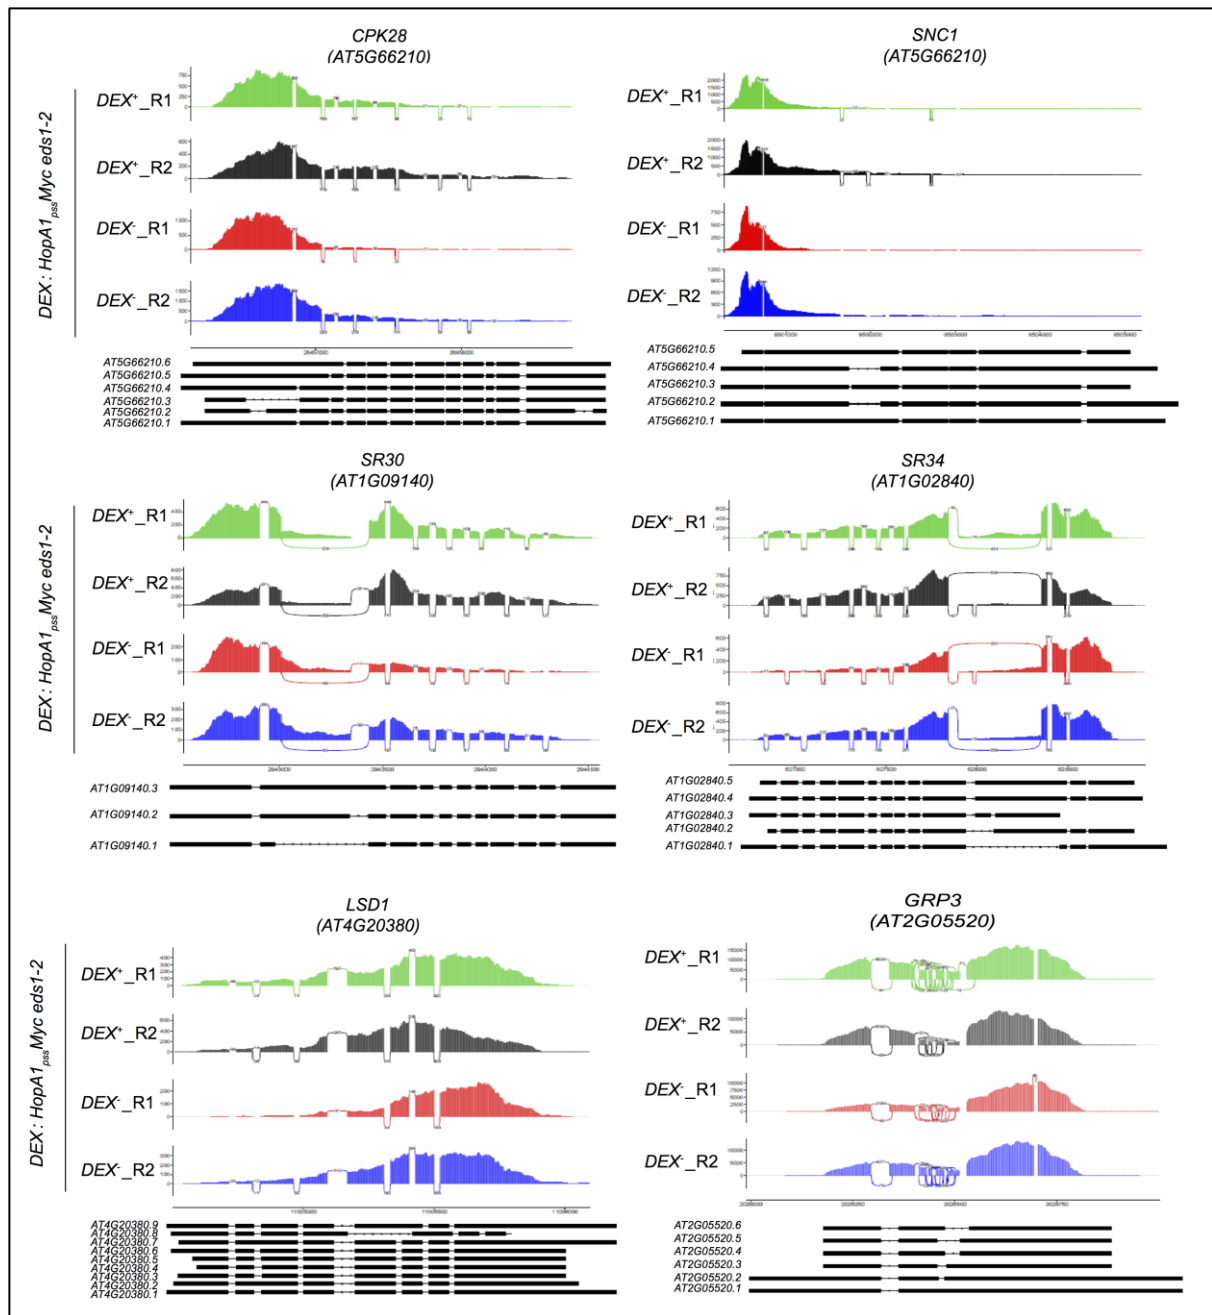

**Supplementary Figure S9: Alternative splicing of transcripts are perturbed during ETI<sup>HopA1<sup>pss</sup></sup>-like responses.** Sashimi plot showing representation of DAS events in selective immunity-associated genes *CPK28*, *SNC1*, *SR30*, *SR34*, *LSD1* and *GRP3* identified in ETI<sup>HopA1<sup>pss</sup></sup>-like DAS datasets.

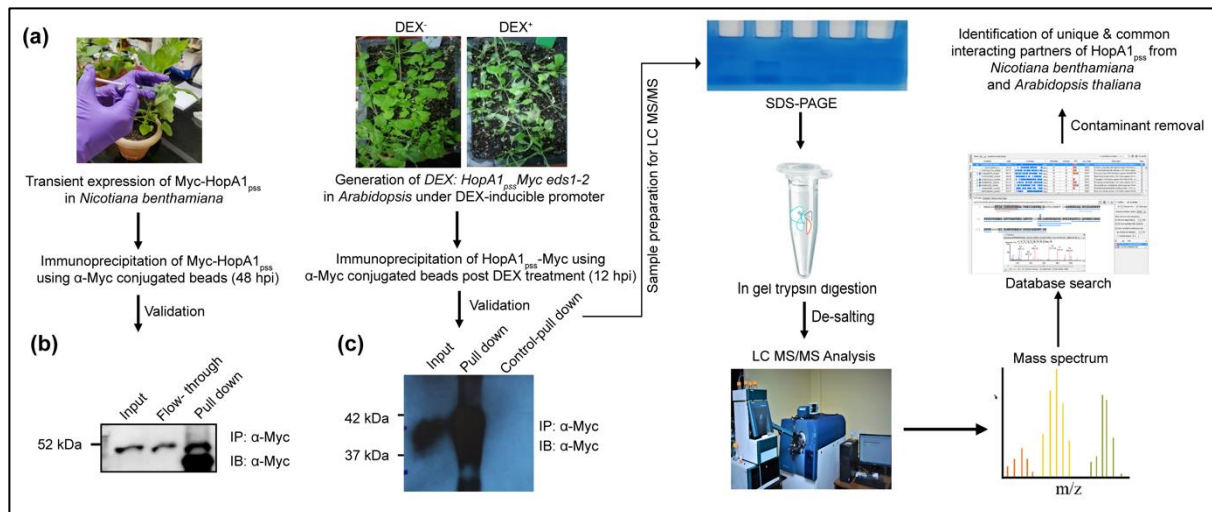

**Supplementary Figure S10: Schematic outline of HopA1<sub>pss</sub> immuno-enrichment steps from plants.** (a) Sample harvesting and processing from transgenic *Arabidopsis* (at 12hpi) or transiently expressing *N. benthamiana* plants (at 48hpi). Anti-Myc immunoblots of enriched samples from (b) *N. benthamiana*, and (c) HopA1<sub>pss</sub>-expressing *Arabidopsis* submitted for LC-MS/MS. Migration position of molecular weight standards (in kDa) are indicated.

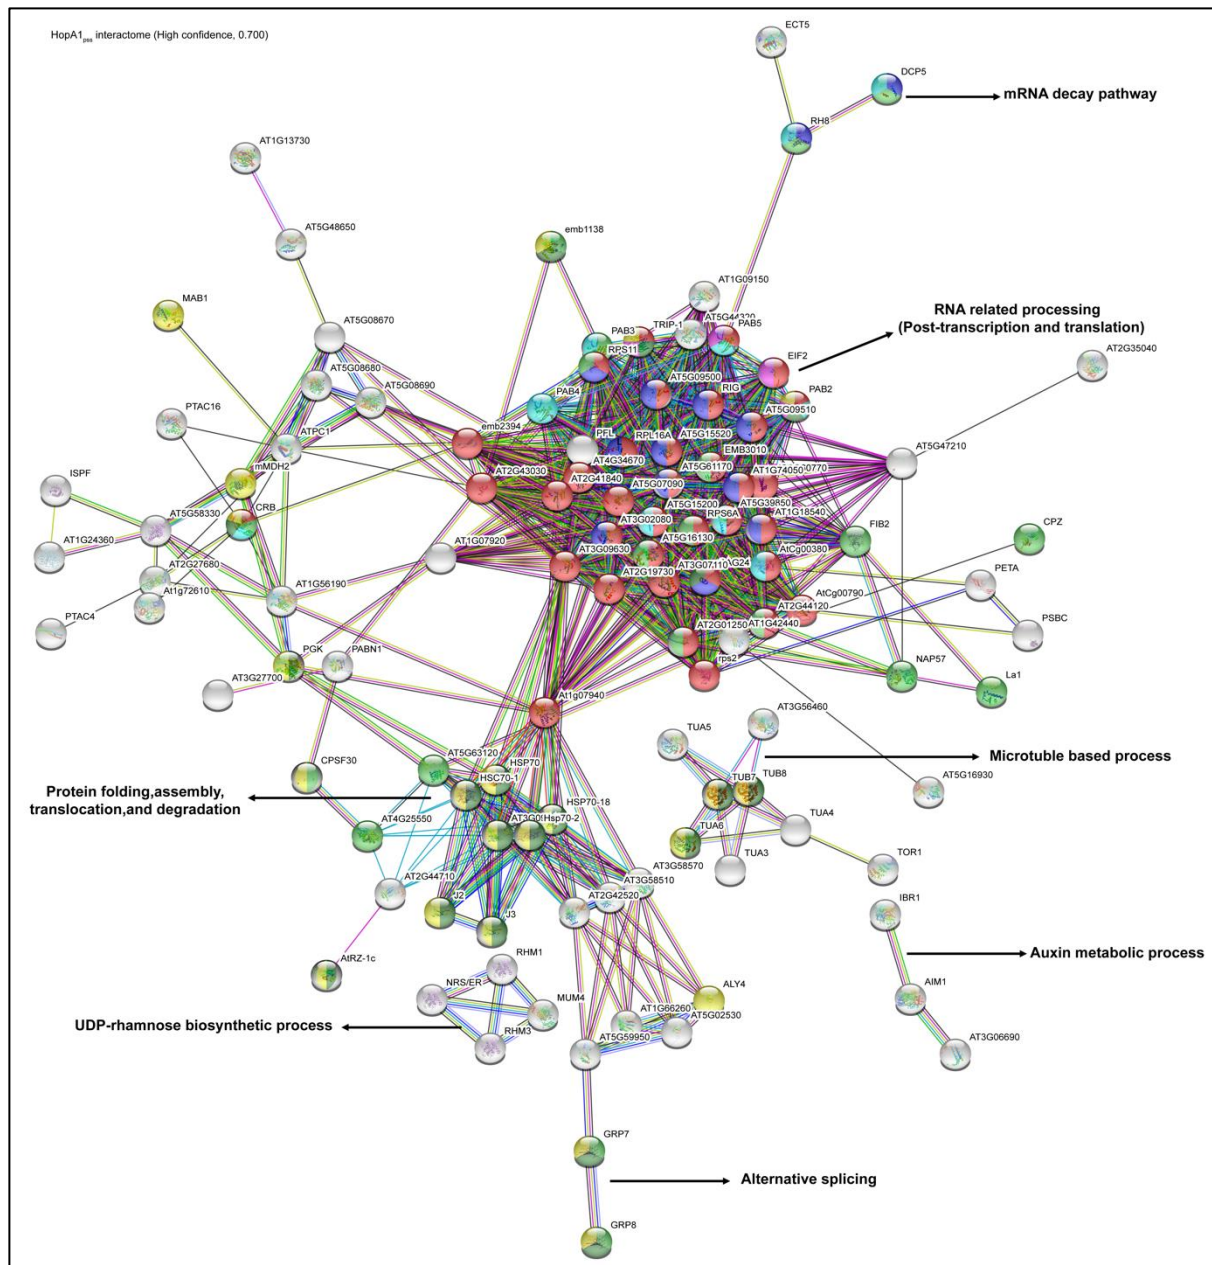

**Supplementary Figure S11: STRING protein-protein interaction network of co-eluting proteins from HopA1<sub>pss</sub> immuno-enrichments.** Functional involvement to cellular processes are indicated next to the protein clusters.

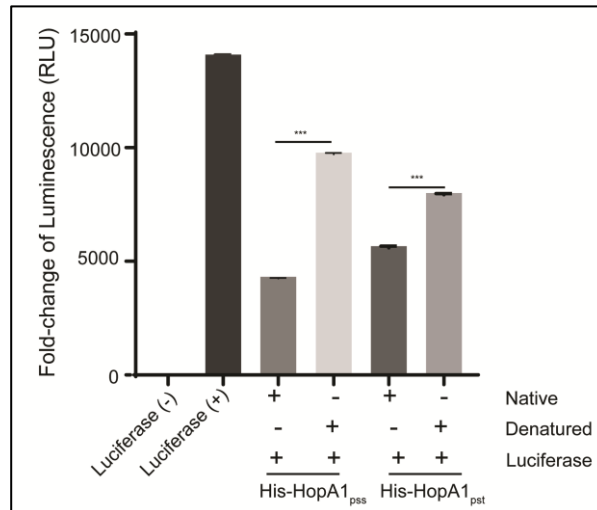

**Supplementary Figure S12: Translational suppression activities are abolished for heat-denatured HopA1s.** Equimolar amounts of HopA1<sub>pss</sub> or HopA1<sub>pst</sub> were either heat-denatured or not and used in *in vitro* transcription-translation assays determining the expression of *LUC* reporter. Expression is measured as RLU (relative luminescence units) and represented as fold-change relative to control (Luc-) reaction. Values are mean  $\pm$  SD of three biological replicates (n=3). Statistical analysis is with student's *t*-test ( $p^{***} < 0.001$ ).

**Supplementary Table S1: Upregulated *R* genes and their categorizations identified in ETI<sup>HopA1pss</sup>**

| TIR-NBS-LRR             | CC-NBS-LRR          | TIR-NBS             | TIR-Domain family       | NB-ARC                 | LRR and NB-ARC domain | NBS-LRR                  | Putative  |
|-------------------------|---------------------|---------------------|-------------------------|------------------------|-----------------------|--------------------------|-----------|
| AT1G17600<br>(SOC3)     | AT1G12290           | AT1G17610<br>(CHS1) | AT1G57630<br>(RPP1-WsB) | AT3G14470<br>(RPP13)   | AT1G61180<br>(UNI)    | AT5G38350                | AT3G14460 |
| AT1G64070<br>(RML1A)    | AT1G33560<br>(ADR1) | AT1G17615<br>(TN2)  | AT2G32140<br>(TIR-X)    | AT3G46710<br>(RPP13-I) |                       | AT5G61240<br>(Cf-5 like) | AT4G33300 |
| AT2G16870               | AT1G63350           |                     |                         | AT4G27220              |                       |                          | AT5G04720 |
| AT3G25510               |                     |                     |                         |                        |                       |                          | AT5G38344 |
| AT4G11170               |                     |                     |                         |                        |                       |                          | AT5G45440 |
| AT4G11340               |                     |                     |                         |                        |                       |                          | AT5G45510 |
| AT4G16890<br>(SNC1)     |                     |                     |                         |                        |                       |                          |           |
| AT4G16860<br>(RPP4)     |                     |                     |                         |                        |                       |                          |           |
| AT4G19520               |                     |                     |                         |                        |                       |                          |           |
| AT5G38340<br>(MSI17.60) |                     |                     |                         |                        |                       |                          |           |
| AT5G41750               |                     |                     |                         |                        |                       |                          |           |
| AT5G45000               |                     |                     |                         |                        |                       |                          |           |

**Supplementary Table S2: Unique differentially alternatively spliced (DAS) candidates and their event classifications identified in ETI<sup>HopA1pss</sup>**

| Alternative 5' splicing                               | Alternative 3' splicing                                   | Intron retention                                 | Mutually exclusive exons            | Exon skipping                                                     |
|-------------------------------------------------------|-----------------------------------------------------------|--------------------------------------------------|-------------------------------------|-------------------------------------------------------------------|
| AT2G05520 (GRP3)                                      | AT3G56860 (UBA2A)                                         | AT1G08230 (GAT1)                                 | AT1G47830 (AP2S)                    | AT1G01240 (Transmembrane Protein)                                 |
| AT3G19190 (ATG2)                                      | AT1G09140 (SR30)                                          | AT1G09140 (SR30)                                 | AT1G60640 (stress response protein) | AT1G05350 (Ubiquitin-like modifier-activating enzyme 5)           |
| AT3G29290 (EMB2076)                                   | AT3G56860 (UBA2A)                                         | AT1G09195 (Ppx-GppA phosphatase)                 | AT2G23760 (BLH4)                    | AT1G07119                                                         |
| AT4G00830 (LIF2)                                      | AT1G65270                                                 | AT1G14320 (SAC52)                                | AT3G28100 (UMAMIT45)                | AT1G07170 (PHD finger-like domain-containing protein 5B)          |
| AT5G53850 (DEP1)                                      | AT1G05870                                                 | AT1G16460 (RDH2)                                 | AT4G17615 (CBL1)                    | AT1G28330 (DRM1)                                                  |
| AT4G10430 (TMPIT-LIKE protein)                        | AT5G23610                                                 | AT1G20510 (OPCL1)                                |                                     | AT1G50440 (C3H)                                                   |
| AT4G00060 (MEE44)                                     | AT1G50840 (POLGAMMA2)                                     | AT1G25277                                        |                                     | AT1G53280 (DJ1B)                                                  |
| AT2G27490 (COAE)                                      | AT4G02450 (P23-1)                                         | AT1G26440 (UPS5)                                 |                                     | AT1G54370 (NHX5)                                                  |
| AT1G63260 (TET10)                                     | AT3G27460 (SGF29A)                                        | AT1G50460 (HKL1)                                 |                                     | AT1G55810 (UKL3)                                                  |
| AT4G12990                                             | AT2G16940 (CC1)                                           | AT1G61150 (GID8)                                 |                                     | AT1G61150                                                         |
| AT4G34265                                             | AT5G64470 (TBL12)                                         | AT1G65270                                        |                                     | AT1G69410                                                         |
| AT1G80245 (Spc97 / Spc98 family of spindle pole body) | AT5G01650                                                 | AT1G69530 (EXPA1)                                |                                     | (eIF5A-2)                                                         |
| AT5G54430 (PHOS32)                                    | AT3G47550 (RING/FYVE/PHD zinc finger superfamily protein) | AT1G70620 (Cyclin-like protein)                  |                                     | AT1G75560                                                         |
| AT2G25850 (PAPS2)                                     | AT4G00560                                                 | AT1G80245 (spec97/spec98 spindle body component) |                                     | AT2G06925 (PLA2-alpha)                                            |
| AT5G48610 (Myc-like protein X)                        | AT3G27460 (SGF29A)                                        | AT2G05440 (GRP9)                                 |                                     | AT2G16940 (CC1)                                                   |
| AT1G09195 (Ppx-GppA phosphatase)                      | AT1G72640                                                 | AT2G05520 (GRP3)                                 |                                     | AT2G20180 (PIL5)                                                  |
| AT4G25880 (APUM6)                                     | AT2G28290 (SYD)                                           | AT2G06005 (FIP1)                                 |                                     | AT2G23985                                                         |
| AT5G01260 (Carbohydrate-binding-like fold)            | AT5G61310                                                 | AT2G32150                                        |                                     | AT2G28550 (RAP2.7)                                                |
| AT3G59640 (PSS1)                                      | AT2G31580 (ICA1)                                          | AT2G32210 (ATHCYSTM6)                            |                                     | AT2G30695                                                         |
| AT3G57050 (CBL)                                       | AT1G53490 (HEI10)                                         | AT2G32500                                        |                                     | AT2G31580 (ICA1)                                                  |
| AT1G70490 (ARF2-A)                                    | AT2G30170 (PBCP)                                          | AT2G36680 (AtVPS37-2)                            |                                     | AT2G46030 (UBC6)                                                  |
| AT2G14260 (PIP)                                       | AT2G05520 (GRP3)                                          | AT2G39950                                        |                                     | AT3G02600 (LPP3)                                                  |
| AT2G05520 (GRP3)                                      | AT2G32710 (KRP4)                                          | AT2G45660 (AGL20)                                |                                     | AT3G11880                                                         |
| AT4G19420 (PAE8)                                      | AT3G56860 (UBA2A)                                         | AT2G46225 (ABIL1)                                |                                     | AT3G28080 (UMAMIT47)                                              |
| AT3G11880                                             | AT2G46225 (ABIL1)                                         | AT3G01500 (CA1)                                  |                                     | AT3G28956 (RPB4)                                                  |
| AT1G08230 (GAT1)                                      | AT3G51750 (Hypothetical Protein)                          | AT3G09180 (MED3)                                 |                                     | AT3G61370 (pre-mRNA-splicing factor CWC22-like protein (DUF3245)) |
| AT3G08710 (TRX9)                                      | AT4G12990 (Transmembrane Protein)                         | AT3G16520 (UGT88A1)                              |                                     | AT4G00060 (MEE44)                                                 |
| AT1G55810 (UKL3)                                      | AT1G52500 (MMH-1)                                         | AT3G19150 (KRP6)                                 |                                     | AT4G00560 (NAD(P)-binding Rossmann-fold)                          |
| AT4G32330 (WDL5)                                      | AT3G21755                                                 | AT3G21755                                        |                                     | AT4G02005                                                         |
|                                                       |                                                           |                                                  |                                     | AT4G10430 (TMPIT-LIKE protein)                                    |

|                                                                            |                                                                |                                                                                 |                                                                        |
|----------------------------------------------------------------------------|----------------------------------------------------------------|---------------------------------------------------------------------------------|------------------------------------------------------------------------|
| AT1G70490 (ARF2-A)                                                         | AT3G26910<br>(Hydroxyproline<br>Rich glycoprotein)             | AT3G26510<br>(Octicosa peptide<br>/Phox/Bem1p)                                  | AT4G12990<br>(Transmembrane<br>Protein)                                |
| AT3G23090 (WDL3)                                                           | AT1G50000                                                      | AT3G29575<br>(AFP3)                                                             | AT4G25050<br>(ACP4)                                                    |
| AT3G55890 (Protein<br>yippee-like)                                         | AT5G55790<br>(Hypothetical<br>Protein)                         | AT3G49160<br>(Pyruvate kinase)                                                  | AT4G34265<br>(Hypothetical<br>protein)                                 |
| AT2G36060 (MMZ3)                                                           | AT3G60510                                                      | AT3G59310<br>(Solute carrier family 35<br>protein (DUF914)                      | AT5G01650 (Tautomerase/MIF<br>superfamily protein)                     |
| AT1G61010 (CPSF73-I)                                                       | AT5G59210<br>(Myosin heavy<br>Chain like protein)              | AT4G01915<br>(Hypothetical<br>Protein)                                          | AT5G10350<br>(RRM)                                                     |
| AT2G28550 (RAP2.7)                                                         | AT5G45350<br>(GPRP-2)                                          | AT4G14385<br>(Histone<br>acetyltransferase subunit<br>NuA4-domain protein)      | AT5G19000<br>(BPM1)                                                    |
| AT5G51620 (UPF0172)                                                        | AT5G11380<br>(DXPS3)                                           | AT4G16890<br>(SNC1)                                                             | AT5G20165<br>(kish)                                                    |
| AT2G39730<br>(RCA)                                                         | AT3G62150<br>(ABCB21)                                          | AT4G20260<br>(PCAP1)                                                            | AT5G26680<br>(SAV6)                                                    |
| AT4G11970<br>(YTH family protein)                                          | AT2G38660<br>(Amino acid<br>Dehydrogenase<br>Family protein)   | AT4G21580<br>(Oxidoreductase, zinc-<br>binding dehydrogenase<br>family protein) | AT5G50950<br>(FUM2)                                                    |
| AT3G45050<br>(Transmembrane<br>protein)                                    | AT1G44780<br>(Translational<br>Initiation factor)              | AT4G21585<br>(ENDO4)                                                            | AT5G53850<br>(DEP1)                                                    |
| AT4G14385 (Histone<br>acetyltransferase<br>subunit NuA4-domain<br>protein) | AT5G24155<br>(FAD/NAD(P)-binding<br>oxidoreductase)            | AT4G23470<br>(PLAC8)                                                            | AT5G56610<br>(PTPMT2)                                                  |
| AT1G01240<br>(Transmembrane<br>Protein)                                    | AT3G11880<br>(DUF2359)                                         | AT4G24580<br>(REN1)                                                             | AT5G62760<br>(P-loop containing nucleoside<br>triphosphate hydrolases) |
| AT2G23985<br>(Hypothetical protein)                                        | AT5G09250<br>(KIWI)                                            | AT4G33940<br>(Ring/U-box superfamily<br>protein)                                | AT5G64500<br>(Major facilitator superfamily<br>protein)                |
| AT1G07700<br>(HHL1)                                                        | AT1G44770<br>(AUL1)                                            | AT4G34390<br>(XLG2)                                                             |                                                                        |
|                                                                            | AT1G75310                                                      | AT4G35770<br>(SEN1)                                                             |                                                                        |
|                                                                            | AT2G28550<br>(RAP2.7)                                          | AT4G36980<br>(CLK4-associating<br>serine/arginine-rich<br>protein)              |                                                                        |
|                                                                            | AT2G35510<br>(SRO1)                                            | AT4G39870<br>(OXR1)                                                             |                                                                        |
|                                                                            | AT4G00355<br>(ATI2)                                            | AT5G09250<br>(KIWI)                                                             |                                                                        |
|                                                                            | AT2G32160<br>(SAM)                                             | AT5G11030<br>(ALF4)                                                             |                                                                        |
|                                                                            | AT4G23470<br>(PLAC8)                                           | AT5G24210 (alpha/beta-<br>Hydrolase's superfamily<br>protein)                   |                                                                        |
|                                                                            | AT2G31865<br>(PARG2)                                           | AT5G27410<br>(D-amino acid<br>aminotransferase-like<br>PLP-dependent enzymes)   |                                                                        |
|                                                                            | AT1G54217<br>(Ribosomal protein<br>L18ae)                      | AT5G45472                                                                       |                                                                        |
|                                                                            | AT2G44750<br>(TPK2)                                            | AT5G51620 (UPF0172)                                                             |                                                                        |
|                                                                            | AT4G21660<br>(Proline-rich<br>spliceosome-associated<br>(PSP)) | AT5G57120 (MUL3.6)                                                              |                                                                        |
|                                                                            | AT1G02840<br>(SR34)                                            | AT5G58200 (MCK7.7)                                                              |                                                                        |
|                                                                            | AT5G49470<br>(RAF10)                                           | AT5G58720<br>(PIPC)                                                             |                                                                        |
|                                                                            | AT3G22950<br>(ARFC1)                                           | AT5G66210<br>(CPK28)                                                            |                                                                        |
|                                                                            | AT4G17640<br>(CKB2)                                            |                                                                                 |                                                                        |
|                                                                            | AT1G02120<br>(VAD1)                                            |                                                                                 |                                                                        |
|                                                                            | AT4G21400<br>(CRK28)                                           |                                                                                 |                                                                        |
|                                                                            | AT4G21090<br>(MFDX2)                                           |                                                                                 |                                                                        |
|                                                                            | AT4G21400<br>(CRK28)                                           |                                                                                 |                                                                        |

AT1G70620  
 AT1G05785  
 (GOT1)  
 AT3G26720  
 (Glycosyl hydrolase  
 family 38)  
 AT4G28370  
 (FLY1) E3 ubiquitin  
 ligase  
 AT4G20380  
 (LSD1)  
 AT1G61150  
 (LisH and RanBPM  
 domains containing  
 protein)  
 AT2G05520  
 (GRP-3)  
 AT4G11900  
 (S-locus lectin protein  
 kinase)  
 AT1G13450  
 (GT-1)  
 AT2G04700  
 (FTRB)  
 AT1G43170  
 (RP1)

---

**Supplementary Table S3: List of *A. thaliana* proteins enriched with HopA1<sub>pss</sub> (provided as a separate Excel file).**

**Supplementary Table S4: List of *N. benthamiana* proteins enriched with HopA1<sub>pss</sub> (provided as a separate Excel file).**

**Supplementary Table S5: Supplementary Table 3: Common HopA1<sub>pss</sub>-interacting/co-eluted proteins identified by mass spectrometry in *N. benthamiana* and *A. thaliana*.**

| Identified protein |                                                         |
|--------------------|---------------------------------------------------------|
| BAIT               | HopA1 <sub>pss</sub>                                    |
| 1                  | Decapping protein 5                                     |
| 2                  | Glycine-rich RNA-binding protein 8                      |
| 3                  | THO complex subunit 4B (ALY2)                           |
| 4                  | Short-chain dehydrogenase/reductase SDRA                |
| 5                  | DEAD-box ATP-dependent RNA helicase 3, chloroplastic    |
| 6                  | 40S ribosomal protein S15-1;40S ribosomal protein S15-3 |
| 7                  | Probable voltage-gated potassium channel subunit beta   |
| 8                  | Bifunctional dTDP-4-dehydrorhamnose 3,5-epimerase       |
| 9                  | 40S ribosomal protein S7-3                              |
| 10                 | DEAD-box ATP-dependent RNA helicase 52                  |
| 11                 | 40S ribosomal protein S6-2                              |
| 12                 | Polyadenylate-binding protein 4 (PAB4)                  |
| 13                 | 3-oxoacyl-[acyl-carrier-protein] reductase, chloroplast |
| 14                 | 40S ribosomal protein S19-3                             |
| 15                 | 60S ribosomal protein L7-2                              |
| 16                 | 60S ribosomal protein L6-1                              |
| 17                 | Trifunctional UDP-glucose 4,6-dehydratase               |
| 18                 | La protein 1 (LA1)                                      |
| 19                 | 40S ribosomal protein S15-4                             |
| 20                 | Glutathione S-transferase F10                           |



**Supplementary Table S6: Structural comparison of HopA1s with PDB entries.** (A) HopA1<sub>pss</sub> ( PDB code 4rsw), or (B) HopA1<sub>pst</sub> (PDB code 4rsx) structures were compared to PDB entries using DALI server (<http://ekhidna2.biocenter.helsinki.fi/dali>). Top 6 hits from each are shown.

| HopA1 <sub>pss</sub> (PDB code-4RSW) |        |      |      |      |      |      |                                                  |
|--------------------------------------|--------|------|------|------|------|------|--------------------------------------------------|
| No                                   | Chain  | Z    | rmsd | lali | nres | % id | PDB description                                  |
| 1                                    | 4rsw-A | 47.0 | 0.0  | 255  | 255  | 100  | HopA1                                            |
| 2                                    | 4rsw-B | 44.9 | 0.3  | 255  | 255  | 100  | HopA1                                            |
| 3                                    | 4rsx-A | 34.8 | 1.8  | 251  | 257  | 51   | TYPE III EFFECTOR HopA1                          |
| 4                                    | 5nvm-A | 8.9  | 3.7  | 117  | 176  | 11   | EUKARYOTIC TRANSLATION INITIATION FACTOR 4E TYPE |
| 5                                    | 5t46-C | 8.8  | 3.4  | 117  | 177  | 12   | EUKARYOTIC TRANSLATION INITIATION FACTOR 4E      |
| 6                                    | 5nvm-C | 8.8  | 3.2  | 114  | 157  | 10   | EUKARYOTIC TRANSLATION INITIATION FACTOR 4E TYPE |

  

| HopA1 <sub>pst</sub> (PDB code-4RSX) |        |      |      |      |      |      |                                                           |
|--------------------------------------|--------|------|------|------|------|------|-----------------------------------------------------------|
| No                                   | Chain  | Z    | rmsd | lali | nres | % id | PDB description                                           |
| 1                                    | 4rsx-A | 46.4 | 0.0  | 257  | 257  | 100  | TYPE III EFFECTOR HopA1                                   |
| 2                                    | 4rsw-B | 35.0 | 1.7  | 251  | 255  | 51   | HopA1                                                     |
| 3                                    | 4rsw-A | 34.8 | 1.8  | 251  | 255  | 51   | HopA1                                                     |
| 4                                    | 6o7z-A | 8.7  | 3.2  | 116  | 181  | 6    | PUTATIVE EUKARYOTIC TRANSLATION INITIATION FACTOR 4E      |
| 5                                    | 6o7y-a | 8.5  | 2.8  | 112  | 183  | 5    | PUTATIVE EUKARYOTIC TRANSLATION INITIATION FACTOR 4E      |
| 6                                    | 6o80-A | 8.3  | 3.0  | 113  | 179  | 4    | PUTATIVE EUKARYOTIC TRANSLATION INITIATION FACTOR 4E TYPE |

**Supplementary Table S7: List of oligonucleotide primers used in this study.**

| Primer Name                           | Primer sequence (5'-3')                                |
|---------------------------------------|--------------------------------------------------------|
| Stg <i>XhoI</i> - <i>XbaI</i> -Myc    | TCGAGCCCCGGGACTAGTATGGAACAAAACTTATTTCTGAAGAAGATCTGTGAT |
| ComStg                                |                                                        |
| <i>XhoI</i> - <i>XbaI</i> -Myc        | CTAGATCACAGATCTTCTTCAGAAATAAGTTTTTGTTCATACTAGTCCCGGGC  |
| HopA1 <sub>pst</sub> _attb1_F         | AAAAAGCAGGCTCAATGAACCCCATTCAGTCA                       |
| HopA1 <sub>pst</sub> _attb2_R         | AGAAAGCTGGGTATCATTTTCGTGTTTCGAA                        |
| <i>XhoI</i> -HopA1 <sub>pss</sub> For | GGCTCGAGATGAATCCTATCCATGCA                             |
| <i>SpeI</i> -HopA1 <sub>pss</sub> Rev | GGACTAGTGTTTCGCGCCCTGAGCGCCG                           |
| <i>XhoI</i> -HopA1 <sub>pst</sub> For | GGCTCGAGATGAACCCCATTCAGTACG                            |
| <i>SpeI</i> -HopA1 <sub>pst</sub> For | GGACTAGTTTTTCGTGTTTCGAAGGGCCG                          |
| qNbPR1_RT_F                           | GGTCAACACGGCGAAAACC                                    |
| qNbPR1_RT_R                           | GCCTTAGCAGCCGTCATGA                                    |
| qNbACTIN_RT_F                         | AACTGATGAAGATACTCACA                                   |
| qNbACTIN_RT_R                         | CAGGATACGGGGAGCTAAT                                    |
| PR5 Tobacco_RT_F                      | CCGAGGTAATTGTGAGACTGGAG                                |
| PR5 Tobacco_RT_R                      | CCTGATTGGGTTGATTAAGTGCA                                |

---

|                                              |                           |
|----------------------------------------------|---------------------------|
| <i>EF1 Tobacco_RT_F</i>                      | TGTGATGTTTTGTTTCGGTCTTTAA |
| <i>EF1 Tobacco_RT_R</i>                      | TCAAAAGAAAATGCAGACAGACTCA |
| <i>HopA1<sub>pss</sub>_RT_F</i>              | TGAGCGGTATCCCTCCTGAA      |
| <i>HopA1<sub>pss</sub>-RT_R</i>              | CTTCTGCCAGCGCCATTTT       |
| <i>MON1_RT_F</i>                             | AACTCTATGCAGCATTGATCCACT  |
| <i>MON1_RT_R</i>                             | TGATTGCATATCTTTATCGCCATC  |
| <i>PR1_RT_F</i>                              | GTGGGTTAGCGAGAAGGCTA      |
| <i>PR1_RT_R</i>                              | ACCTTGGCACATCCGAGTCT      |
| <i>ICS1_RT_F</i>                             | TACTAACCAGTCCGAAAGACG     |
| <i>ICS1_RT_R</i>                             | GAGGCTTGACAACAACCTCTGT    |
| <i>PAD4_RT_F</i>                             | TCTTAGCCGAGCCACTCGAC      |
| <i>PAD4_RT_R</i>                             | TTCTCGCCTCATCCAACCAC      |
| <i>FRK1_RT_F</i>                             | CGGTCAGATTTCAACAGTTGTC    |
| <i>FRK1_RT_R</i>                             | AATAGCAGGTTGGCCTGTAATC    |
| <i>FOX1_RT_F</i>                             | GGCTGCACTTCAACCCTTAC      |
| <i>FOX1_RT_R</i>                             | TTACTCTCTGTGGCGTTTGG      |
| <i>WRKY22_RT_F</i>                           | TCCTTCGGAGAGATTCGAGA      |
| <i>WRKY22_RT_R</i>                           | CTGCTGCTACATGGCACACT      |
| <i>WRKY29_RT_F</i>                           | CCCGGAGAAATTCACCATAA      |
| <i>WRKY29_RT_R</i>                           | ATCAGCGGATGGGATCATAG      |
| <i>WAK2_RT_F</i>                             | CGTGTGAGTACACAAATCATCG    |
| <i>WAK2_RT_R</i>                             | TGGTTTAACCTCCTTTGTCTTC    |
| <i>CYP81F2_RT_F</i>                          | AAATGGAGAGAGCAACACAATG    |
| <i>CYP81F2_RT_F</i>                          | ATCGCCCATTCCAATGTTAC      |
| <i>FLS2_RT_F</i>                             | ACTCTCCTCCAGGGGCTAAGGAT   |
| <i>FLS2_qPCR_R</i>                           | AGCTAACAGCTCTCCAGGGATGG   |
| <i>Luciferase_RT_F</i>                       | GACCAACGCCTTGATTGACA      |
| <i>Luciferase_RT_R</i>                       | CGTGCTCCAAAACAACAACGSS    |
| <i>Rabbit <math>\beta</math>-globin_RT_F</i> | TTTGCTAAGCTGAGTGAAGTGC    |
| <i>Rabbit <math>\beta</math>-globin_RT_R</i> | CCAGCCACCACCACCTTCTGATA   |

---
